# Supplementary material for: Decision-making strategies implemented in SolFinder 1.0 to identify eco-efficient aircraft trajectories: application study in AirTraf 3.0
Source: Copernicus journal article supplement (doi:10.5194/gmd-17-4031-2024), 2024-05-17
Supplement: Supplementary file 1 [file gmd-17-4031-2024-supplement.pdf]

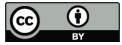

*Supplement of*

## **Decision-making strategies implemented in SolFinder 1.0 to identify eco-efficient aircraft trajectories: application study in AirTraf 3.0**

**Federica Castino et al.**

*Correspondence to:* Federica Castino (f.castino@tudelft.nl)

The copyright of individual parts of the supplement might differ from the article licence.

---

# **SolFinder**

*Release 1.0.4*

**Federica Castino**

**Jun 7, 2023**



**CONTENTS:**

- 1 Introduction** **1**
- 1.1 Background information . . . . . 1
- 1.2 Installation . . . . . 1
- 1.3 Get started . . . . . 1
  
- 2 Code documentation** **3**
- 2.1 Description of solfinder.MCDM module . . . . . 3
- 2.2 Example application . . . . . 8
  
- Index** **13**



## INTRODUCTION

### 1.1 Background information

SolFinder library to find a solution among a set of Pareto optimal solutions, according to the preferences of the decision-maker. This library has been developed with the aim of identifying eco-efficient aircraft trajectories. The following options are available:

- option selecting a solution closest to a target change in one of the objectives
- Gray Relational Analysis (GRA, [1])
- Technique for Order of Preference by Similarity to Ideal Solution (TOPSIS, [1, 2])
- Viekriterijumsko Kompromisno Rangiranje (VIKOR, [1, 3]) method.

**License:** SolFinder is released under GNU Lesser General Public License v3.0 (LGPL-3.0-or-later).

© 2023 Federica Castino

### 1.2 Installation

```
pip install solfinder
```

### 1.3 Get started

```
import solfinder.MCDM as MCDM
import numpy as np

# Upload example dataset
with open(r'tests/Data_example/POBJ_20180101000005_0_51_28_41.dat', 'r') as f:
    data = np.loadtxt(f, unpack=True)

# Values of objective functions
soc = data[0] # Simple Operating Costs
atr = data[1] # ATR20 total

# Find Pareto optimal solutions using available options
```

```
index_target_05 = MCDM.Target.solution_found_with_target(MCDM.Target(),0.5,soc)
index_gra       = MCDM.GRA.solution_found_by_gra(MCDM.GRA(), data)
index_topsis    = MCDM.TOPSIS.solution_found_by_topsis(MCDM.TOPSIS(), data, [0.5,0.5])
set_indices_vikor, index_vikor = MCDM.VIKOR.solution_found_by_vikor(MCDM.VIKOR(),
                             data, 0.5, [0.5, 0.5])
```

## CODE DOCUMENTATION

### 2.1 Description of solfinder.MCDM module

**class** solfinder.MCDM.GRA

Bases: object

A class used to identify the Pareto optimal solution using the Gray Relational Analysis (GRA).

**static** **dist\_gra**(*v*)

Calculate distance as defined in Gray Relational Analysis (GRA)

**Parameters**

**v** (*numpy.ndarray*) – values of  $i^{\text{th}}$  objective

**Returns**

distances from maximum value of *v*

**Return type**

*numpy.ndarray*

**static** **grc**(*distances*, *n\_sol*)

Calculate Gray Relational Coefficient (GRC)

**Parameters**

- **distances** (*numpy.ndarray*) – distances from maximum value of *v*
- **n\_sol** (*int*) – number of Pareto optimal solutions

**Returns**

GRC for each solution

**Return type**

*numpy.ndarray*

**static** **norm\_gra\_min**(*v*)

Normalize values of objective function to be minimized

**Parameters**

**v** (*numpy.ndarray*) – values of objective function

**Returns**

normalized *v*

**Return type**

*numpy.ndarray*



**static** `pref_gra`(*grc*)

Identify solution with the largest Gray Relational Coefficient (GRC)

**Parameters****grc** (*numpy.ndarray*) – values of Gray Relational Coefficient for each solution**Returns**

index of solution maximizing GRC

**Return type**

int

**static** `solution_found_by_gra`(*pobj*)

Select a single solution among the Pareto optimal solutions using Gray Relational Analysis (GRA)

**Parameters****pobj** (*numpy.ndarray*) – values of objective functions**Returns**

index of identified solution

**Return type**

int

**class** `solfinder.MCDM.TOPSIS`

Bases: object

A class used to identify the Pareto optimal solution using the Technique for Order of Preference by Similarity to Ideal Solution (TOPSIS).

**static** `closeness`(*dist\_nis*, *dist\_pis*)

Calculate Closeness parameter

**Parameters**

- **dist\_nis** (*numpy.ndarray*) – distances from negative ideal solution
- **dist\_pis** (*numpy.ndarray*) – distances from positive ideal solution

**Returns**

closeness parameters for each solution

**Return type***numpy.ndarray***static** `dist_nis_topsis`(*v*)

Calculate distance of each solution to the Negative Ideal Solution (NIS)

**Parameters****v** (*numpy.ndarray*) – values of objective function**Returns**

distances from NIS

**Return type***numpy.ndarray***static** `dist_pis_topsis`(*v*)

Calculate distance of each solution to the Positive Ideal Solution (PIS)

**Parameters****v** (*numpy.ndarray*) – values of objective function

**Returns**

distances form PIS

**Return type**

numpy.ndarray

**static norm\_topsis**(*w*, *v*)

Normalize and weight values of objective function

**Parameters**

- **w** (*float*) – relative weight assigned to objective *v*
- **v** (*numpy.ndarray*) – values of objective function

**Returns**normalized and weighted values of *v***Return type**

numpy.ndarray

**static pref\_topsis**(*c*)

Identify solution with largest value of the closeness parameter

**Parameters****c** (*numpy.ndarray*) – closeness parameter**Returns**

index of identified solution

**Return type**

int

**solution\_found\_by\_topsis**(*pobj*, *weights*)

Select a single solution among the Pareto optimal solutions using Technique for Order of Preference by Similarity to Ideal Solution (TOPSIS)

**Parameters**

- **pobj** (*numpy.ndarray*) – values of optimization objective functions
- **weights** (*list*) – relative weights of objective functions

**Returns**

index of solution found using TOPSIS

**Return type**

int

**class solfinder.MCDM.Target**

Bases: object

A class used to identify the Pareto optimal solution closest to a target percentage change in one of the objective functions.

**static rel\_change**(*v*)

Calculate relative change w.r.t. minimum value of objective

**Parameters****v** (*numpy.ndarray*) – values of objective function at each pareto opt. solution**Returns**relative change w.r.t. minimum value of *v*

**Return type**

numpy.ndarray

**solution\_found\_with\_target**(*x*, *v*)

Identify solution closest to *x*% increase in objective *v*

**Parameters**

- *x* (*float*) – target percentage change
- *v* (*numpy.ndarray*) – values of objective function at each pareto opt. solution

**Returns**

index of identified solution

**Return type**

numpy.int64

**class** solfinder.MCDM.VIKOR

Bases: object

A class used to identify the Pareto optimal solution using the Viekriterijumsko Kompromisno Rangiranje (VIKOR) method.

**static dist\_r\_vikor**(*w*, *v*)

Calculate regret measure (R)

**Parameters**

- *w* (*list*) – relative weights of optimization objectives
- *v* (*numpy.ndarray*) – values of objective functions

**Returns**

values of the parameter R

**Return type**

numpy.ndarray

**static dist\_s\_vikor**(*w*, *v*)

Calculate utility measure (S)

**Parameters**

- *w* (*list*) – relative weights of optimization objectives
- *v* (*numpy.ndarray*) – values of objective functions

**Returns**

values of the parameter S

**Return type**

numpy.ndarray

**static pref\_vikor**(*q*, *dist\_s*, *dist\_r*)

Rank solutions and use conditions of acceptable advantage and stability

**Parameters**

- *q* (*numpy.ndarray*) – values of the parameter Q
- *dist\_s* (*numpy.ndarray*) – values of the parameter Q
- *dist\_r* (*numpy.ndarray*) – values of the parameter Q

**Returns**

index/indices of recommended solution(s)

**Return type**

list

**static** `q_vikor`(*gamma*, *s*, *r*)

Calculate parameter Q, combining S and R

**Parameters**

- **gamma** (*float*) – relative importance of group utility
- **s** (*numpy.ndarray*) – values of the parameter S
- **r** (*numpy.ndarray*) – values of the parameter R

**Returns**

values of the parameter Q

**Return type**

*numpy.ndarray*

**static** `single_vikor`(*pobj*, *weights*, *set\_sol\_selected\_by\_vikor*)

Select a single solution among the set of solutions identified with the VIKOR method

**Parameters**

- **pobj** (*numpy.ndarray*) – values of objective function
- **weights** (*list*) – relative importance of optimization objectives
- **set\_sol\_selected\_by\_vikor** (*list*) – indices of solutions selected by VIKOR

**Returns**

index of selected solution

**Return type**

int

**solution\_found\_by\_vikor**(*pobj*, *gamma*, *weights*)

Select a set of solutions among the Pareto optimal solutions using the Viekriterijumsko Kompromisno Rangiranje (VIKOR) method

**Parameters**

- **pobj** (*numpy.ndarray*) – values of objective function
- **gamma** (*float*) – relative importance of group utility
- **weights** (*list*) – relative importance of optimization objectives

**Returns**

set of solutions, single solution selected by VIKOR

**Return type**

list, int

**class** `solfinder.MCDM.VikorTarget`

Bases: object

A class used to identify the Pareto optimal solution using the Viekriterijumsko Kompromisno Rangiranje (VIKOR) method, while constraining the increase in one of the objectives

**static solution\_found\_by\_vikor\_target**(*pobj, gamma, weights, index\_limited\_obj, x*)

Select a solution with VIKOR. If the resulting change in one of the objective is larger than a threshold, then pick the solution closest to such threshold instead.

#### Parameters

- **pobj** (*numpy.ndarray*) – values of objective function
- **gamma** (*float*) – relative importance of group utility
- **weights** (*list*) – relative importance of optimization objectives
- **index\_limited\_obj** (*int*) – index of the objective to be constrained
- **x** (*float*) – target/threshold relative change of objective

#### Returns

index of selected solution

#### Return type

int

## 2.2 Example application

```
import solfinder.MCDM as MCDM
import numpy as np
import matplotlib.pyplot as plt

# Upload example dataset
with open(r'tests/Data_example/POBJ_20180101000005_0_51_28_41.dat', 'r') as f:
    data = np.loadtxt(f, unpack=True)

# Values of objective functions
soc = data[0]
atr = data[1]

# Number of Pareto optimal solutions
n_sol = len(soc)

# Find Pareto optimal solutions using available options
index_target_05 = MCDM.Target.solution_found_with_target(MCDM.Target(), 0.5, soc)
index_gra       = MCDM.GRA.solution_found_by_gra(MCDM.GRA(), data)
index_topsis    = MCDM.TOPSIS.solution_found_by_topsis(MCDM.TOPSIS(), data, [0.5, 0.5])
set_indices_vikor, index_vikor = MCDM.VIKOR.solution_found_by_vikor(MCDM.VIKOR(),
    data, 0.5, [0.5, 0.5])

# Plot of Pareto front and selected solutions
plt.scatter(100 * (atr - max(atr)) / max(atr),
    MCDM.Target.rel_change(soc), s=20, c='grey')
plt.scatter(100 * (atr[index_target_05] - max(atr)) / max(atr),
    100 * (soc[index_target_05] - min(soc)) / min(soc),
    s=40, c='red', label='Target +0.5% SOC')
plt.scatter(100 * (atr[index_gra] - max(atr)) / max(atr),
    100 * (soc[index_gra] - min(soc)) / min(soc),
    s=40, c='blue', label='GRA')
```

```

plt.scatter(100 * (atr[index_topsis] - max(atr)) / max(atr),
            100 * (soc[index_topsis] - min(soc)) / min(soc),
            s=40, c='orange', label='TOPSIS')
plt.scatter(100 * (atr[index_vikor] - max(atr)) / max(atr),
            100 * (soc[index_vikor] - min(soc)) / min(soc),
            s=40, c='green', label='VIKOR')
plt.xlabel(r'Change in ATR20 [%]', fontsize=16, labelpad=15)
plt.ylabel(r'Change in SOC [%]', fontsize=16, labelpad=15)
plt.title('Number of solutions: {}'.format(n_sol))
plt.legend()
plt.grid(True)
plt.show()

```

Output:

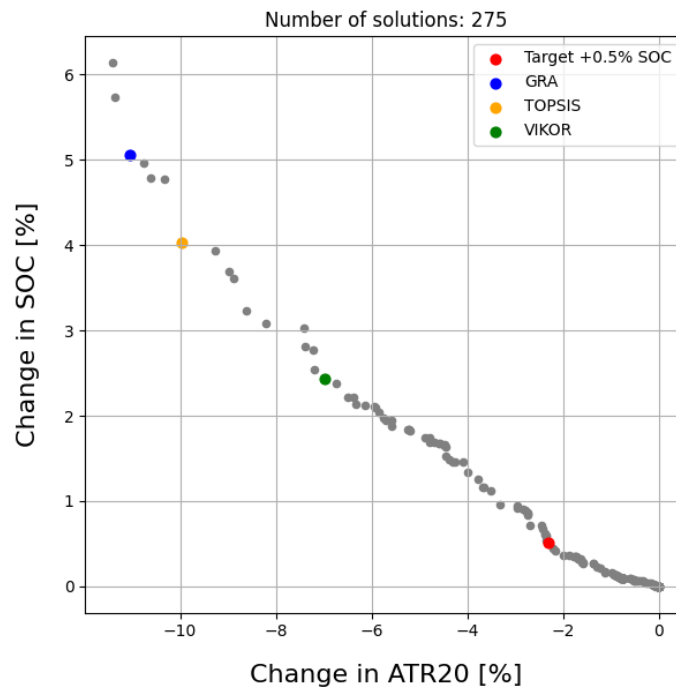

Figure S1: Output of example application code.



## BIBLIOGRAPHY

- [1] Zhiyuan Wang and Gade Pandu Rangaiah. Application and Analysis of Methods for Selecting an Optimal Solution from the Pareto-Optimal Front obtained by Multiobjective Optimization. *Industrial & Engineering Chemistry Research*, 56(2):560–574, 1 2017.
- [2] Shu-Jen Chen and Ching-Lai Hwang. *Fuzzy Multiple Attribute Decision Making*, volume 375. Springer Berlin Heidelberg, Berlin, Heidelberg, 1992.
- [3] Serafim Opricovic and Gwo-Hshiung Tzeng. Compromise solution by MCDM methods: A comparative analysis of VIKOR and TOPSIS. *European Journal of Operational Research*, 156(2):445–455, 7 2004.





## C

`closeness()` (*solfinder.MCDM.TOPSIS static method*), 4

## D

`dist_gra()` (*solfinder.MCDM.GRA static method*), 3

`dist_nis_topsis()` (*solfinder.MCDM.TOPSIS static method*), 4

`dist_pis_topsis()` (*solfinder.MCDM.TOPSIS static method*), 4

`dist_r_vikor()` (*solfinder.MCDM.VIKOR static method*), 6

`dist_s_vikor()` (*solfinder.MCDM.VIKOR static method*), 6

## G

`GRA` (*class in solfinder.MCDM*), 3

`gra()` (*solfinder.MCDM.GRA static method*), 3

## M

module

`solfinder.MCDM`, 3

## N

`norm_gra_min()` (*solfinder.MCDM.GRA static method*), 3

`norm_topsis()` (*solfinder.MCDM.TOPSIS static method*), 5

## P

`pref_gra()` (*solfinder.MCDM.GRA static method*), 3

`pref_topsis()` (*solfinder.MCDM.TOPSIS static method*), 5

`pref_vikor()` (*solfinder.MCDM.VIKOR static method*), 6

## Q

`q_vikor()` (*solfinder.MCDM.VIKOR static method*), 7

## R

`rel_change()` (*solfinder.MCDM.Target static method*), 5

## S

`single_vikor()` (*solfinder.MCDM.VIKOR static method*), 7

`solfinder.MCDM`  
module, 3

`solution_found_by_gra()` (*solfinder.MCDM.GRA static method*), 4

`solution_found_by_topsis()`  
(*solfinder.MCDM.TOPSIS method*), 5

`solution_found_by_vikor()`  
(*solfinder.MCDM.VIKOR method*), 7

`solution_found_by_vikor_target()`  
(*solfinder.MCDM.VikorTarget static method*), 7

`solution_found_with_target()`  
(*solfinder.MCDM.Target method*), 6

## T

`Target` (*class in solfinder.MCDM*), 5

`TOPSIS` (*class in solfinder.MCDM*), 4

## V

`VIKOR` (*class in solfinder.MCDM*), 6

`VikorTarget` (*class in solfinder.MCDM*), 7
